# Supplementary material for: Soil fertility relates to fungal-mediated decomposition and organic matter turnover in a temperate mountain forest
Source: PubMed Central journal article supplement (PMC7611052; doi:10.1111/nph.17421), 2021-05-20
Supplement: EMS126083-supplement-Supporting_Information.pdf [file EMS126083-supplement-Supporting_Information.pdf]

## Supporting Information

Additional Supporting Information may be found online in the Supporting Information section at the end of the article.

**Fig. S1** Layout of the 16 plots along the fertility gradient.

**Fig. S2** Principal component analysis (PCA) analysing Ellenberg indicator values of vascular plants of the ground vegetation layer.

**Fig. S3** Relationship between fertility index and mineral soil organic C concentration, N concentration, inorganic C concentration, pH, bulk density, stone content, moisture and temperature, respectively.

**Fig. S4** Relationship between fertility index and selected fungal guild ratios.

**Methods S1** Determination of total mineral soil organic carbon and nitrogen stocks.

**Methods S2** Calculation of integrative fertility index based on Ellenberg indicator values.

**Table S1** List of vascular plant species in the ground vegetation layer and their Ellenberg indicator values.

**Table S2** Total mineral soil organic C and N stocks.

**Table S3** List of fungal taxonomic groups including abundance and lifestyle/guild.

**Table S4** Relationship between relative abundance of selected soil fungal guilds, guild ratios, and microbial respiration, and potential enzyme activities in mineral soil.

**Table S5** Relationship between relative abundance of soil fungal guilds and microbial respiration, and potential enzyme activities per g soil C.

Please note: Wiley Blackwell are not responsible for the content or functionality of any Supporting Information supplied by the authors. Any queries (other than missing material) should be directed to the *New Phytologist* Central Office.

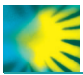

### About *New Phytologist*

- *New Phytologist* is an electronic (online-only) journal owned by the New Phytologist Foundation, a **not-for-profit organization** dedicated to the promotion of plant science, facilitating projects from symposia to free access for our Tansley reviews and Tansley insights.
- Regular papers, Letters, Viewpoints, Research reviews, Rapid reports and both Modelling/Theory and Methods papers are encouraged. We are committed to rapid processing, from online submission through to publication 'as ready' via *Early View* – our average time to decision is <26 days. There are **no page or colour charges** and a PDF version will be provided for each article.
- The journal is available online at Wiley Online Library. Visit **www.newphytologist.com** to search the articles and register for table of contents email alerts.
- If you have any questions, do get in touch with Central Office (np-centraloffice@lancaster.ac.uk) or, if it is more convenient, our USA Office (np-usaoffice@lancaster.ac.uk)
- For submission instructions, subscription and all the latest information visit **www.newphytologist.com**
